# Supplementary material for: MAIT cell enrichment in Lynch syndrome is associated with immune surveillance and colorectal cancer risk
Source: Research Square preprint supplement (doi:10.21203/rs.3.rs-7273425/v1), 2025-08-25
Supplement: Supplementary file [file f5aa7140e8d462d66b171cd8.pdf]

# SUPPLEMENTAL FIGURES AND LEGENDS

Figure S1

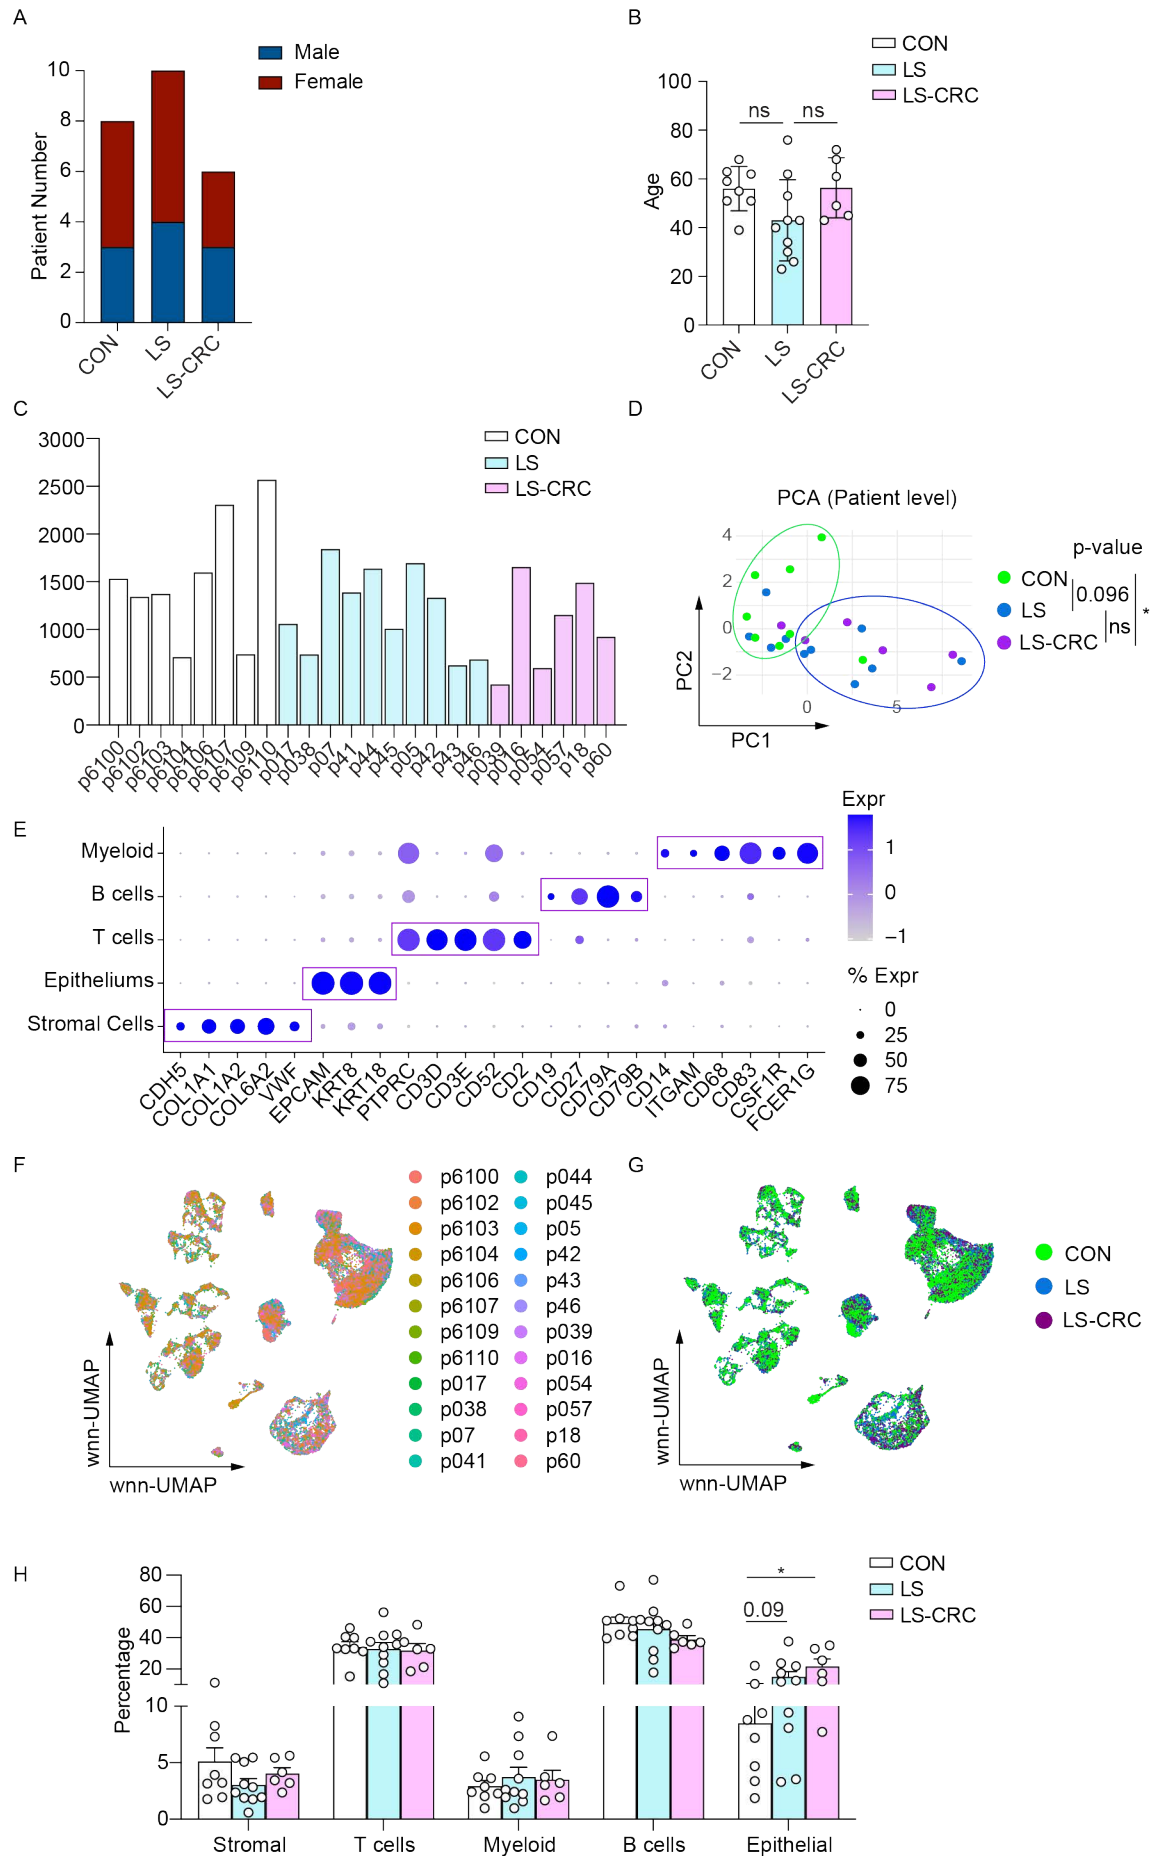

**Figure S1. Demographics of subjects and cellular landscape of human colorectal tissues revealed by ExCITE-seq profiling.**

(A) Distribution of male and female subjects across the three study groups: CON, LS, and LS-CRC (see Table S1).

(B) Comparison of individual age among the three groups (see Table S1).

(C) Total number of cells recovered per individual from ExCITE-seq, grouped by condition.

(D) Principal component analysis (PCA) plot showing individual-level clustering based on global transcriptional profiles. Each dot represents an individual and is colored by group: CON (green), LS (navy), and LS-CRC (purple). Statistical significance was assessed by PERMANOVA

(E) Dot plot displaying the expression of selected canonical marker genes across cell types. Dot size reflects the percentage of cells expressing each gene; color intensity indicates average log-normalized expression.

(F-G) UMAP projection of all cells colored by individual donors (F) or groups (G) (CON, LS, and LS-CRC.) shows broad overlap across conditions, indicating effective batch correction and integration across datasets.

(H) Proportions of five major cell compartments (stromal, T cells, myeloid, B cells, and epithelial cells) across CON, LS, and LS-CRC. Percentages are calculated relative to total cells per sample.

Dots represent one individual and bars show mean  $\pm$  SEM for (B) and (H). Statistical significance was determined by two-way ANOVA (Holm-Šidák post hoc test, \* $p < 0.05$ , \*\* $p < 0.001$ , ns = not significant).

Figure S2

A

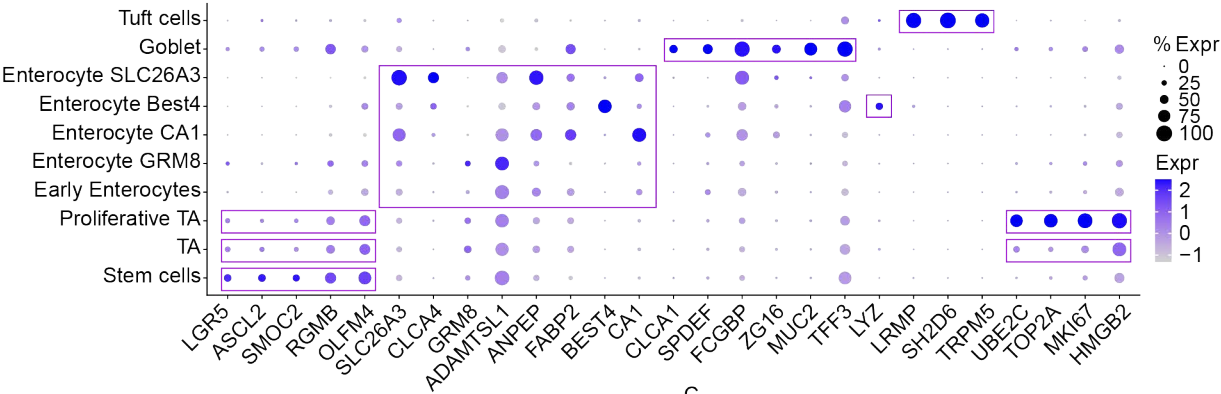

B

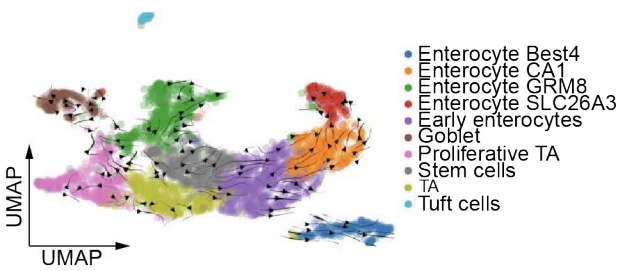

C

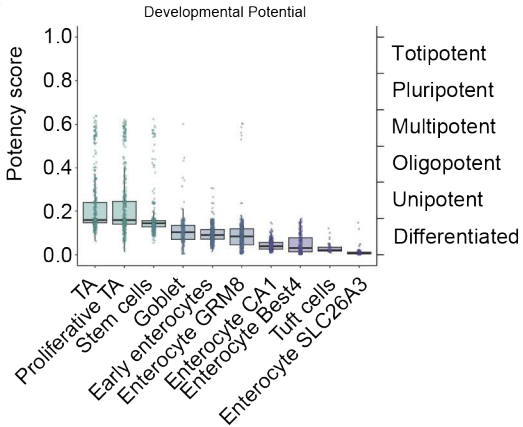

D

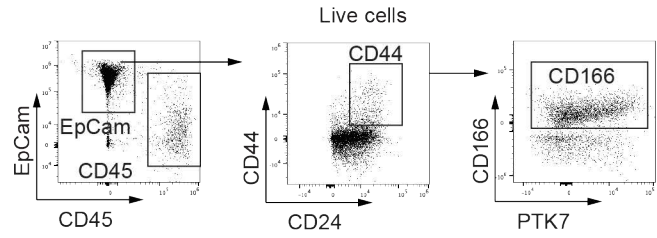

E

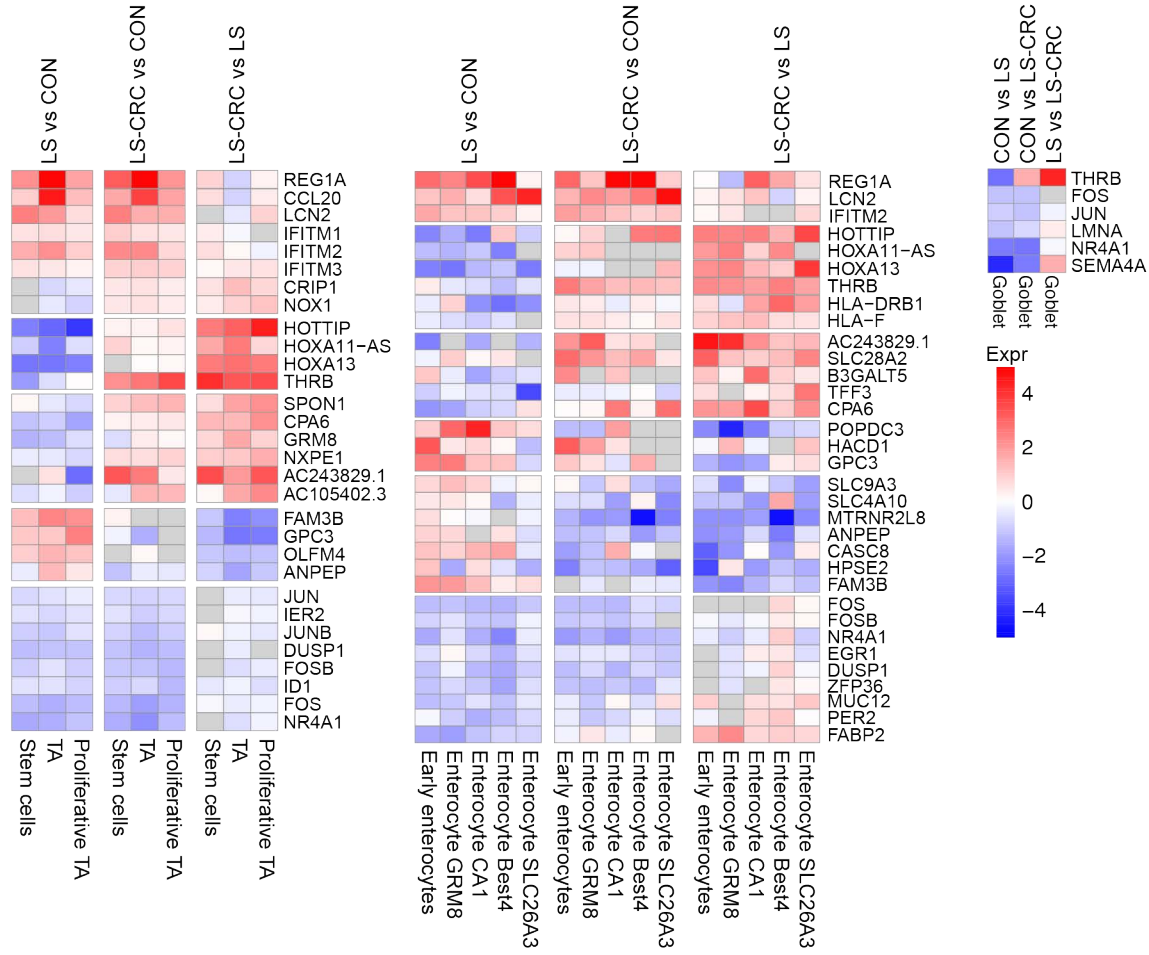

**Figure S2. ExCITE-seq and flow cytometric analysis of epithelial cells in colorectal tissues.**

(A) Dot plot showing expression of canonical markers among indicated subtypes used to define epithelial cell types. Dot size indicates the percentage of cells expressing each gene; color intensity reflects average log-normalized expression.

(B) Pseudotime and fate probability map generated using CellRank, illustrating inferred trajectories from progenitor populations toward differentiated enterocyte subtypes.

(C) Developmental potential scores across epithelial subtypes, calculated using CytoTRACE.

(D) Flow cytometry gating strategies used to identify EpCAM<sup>+</sup> cells and EpCAM<sup>+</sup>CD44<sup>+</sup>CD166<sup>+</sup> cells representing epithelial cells and epithelial stem and progenitor cells, respectively.

(E) Top differentially expressed genes (DEGs) per epithelial subtype are shown for three comparisons: LS vs CON, LS-CRC vs CON, and LS-CRC vs LS. Rows represent genes, and columns represent epithelial subtypes. Color intensity denotes logFC values, with upregulation in red and downregulation in blue. Non-significant genes (p-value > 0.05) are shaded in gray. Full statistical results including adjusted p-values (Benjamini-Hochberg correction) are provided in Table S2.

Figure S3

A

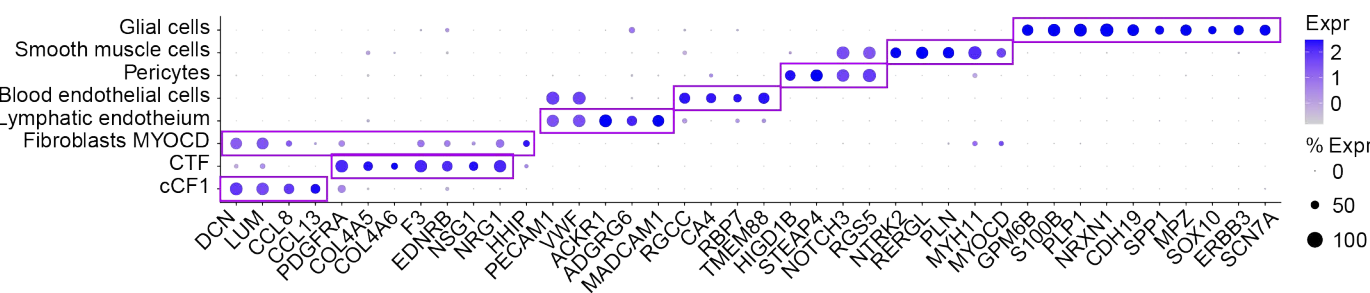

B

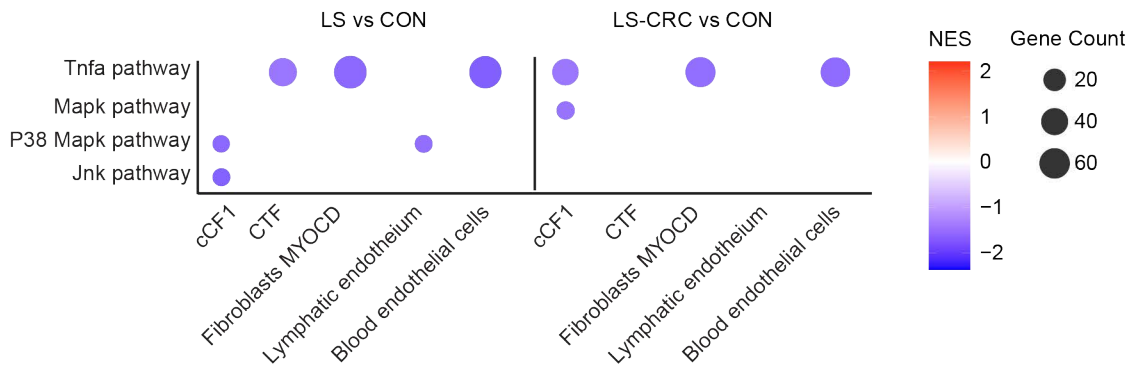

C

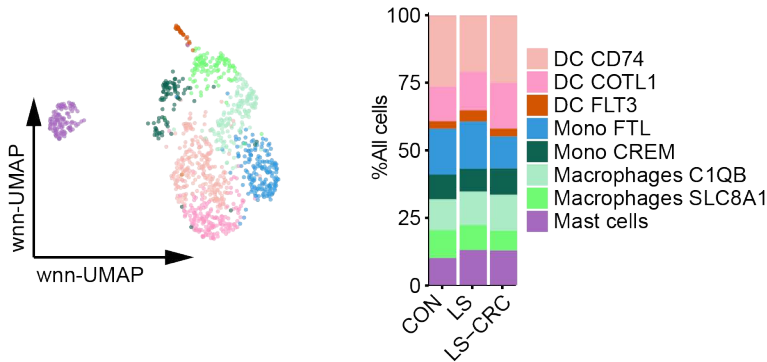

D

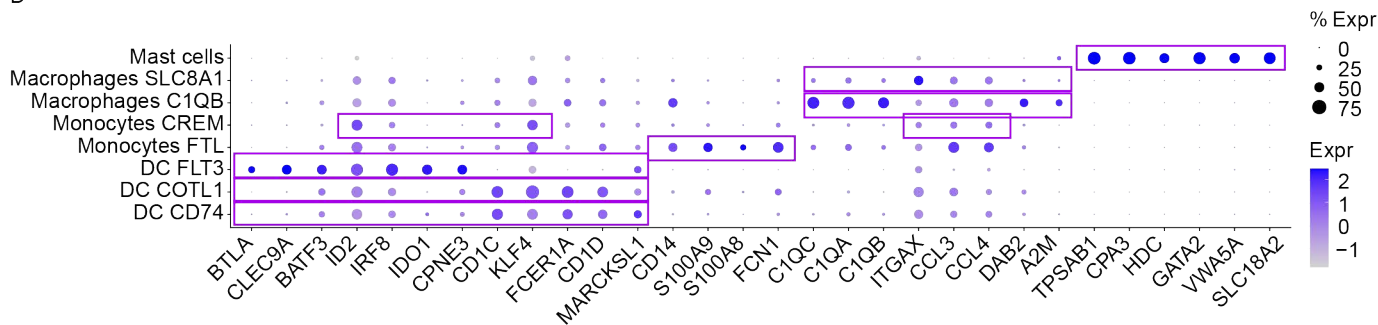

**Figure S3. Characterization of stromal and myeloid subtypes.**

- (A) Dot plots showing canonical marker gene expression used to define stromal cell subtypes. Dot size represents the percentage of expressing cells, and color intensity reflects average log-normalized expression.
- (B) GSEA of stromal cells comparing CON vs LS and CON vs LS-CRC. Each dot represents a differentially regulated pathway for a given stromal cell subtype, with color indicating the normalized enrichment score (NES) and dot size reflecting the number of genes contributing to the differential regulation (Gene count).
- (C) wnn-UMAP projection (left) and bar graph showing relative abundance (right) of myeloid cells in CON, LS, and LS-CRC.
- (D) Dot plots showing canonical marker gene expression used to define myeloid cell subtypes. Dot size represents the percentage of cells expressing the gene, and color intensity reflects average log-normalized expression.

Figure S4

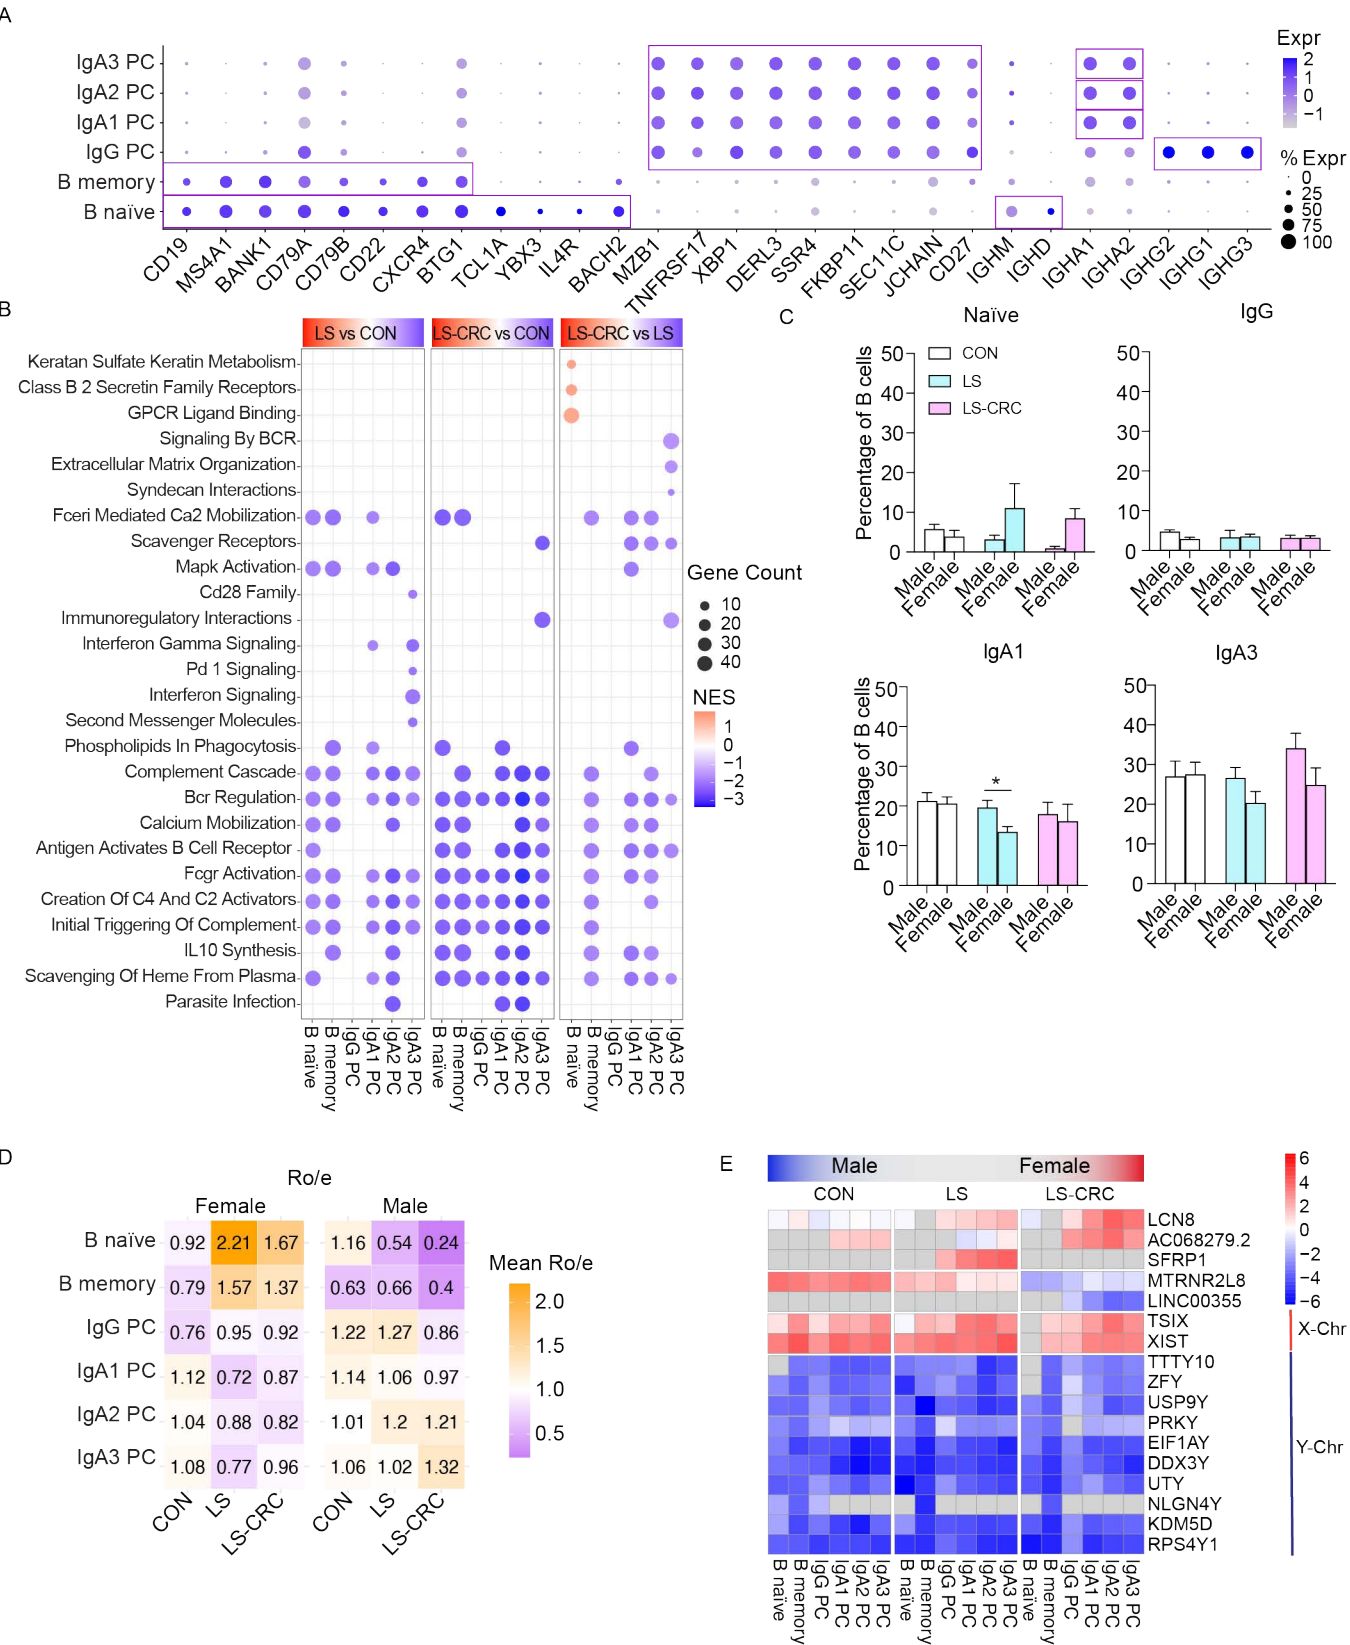

**Figure S4. Characterization of B cells stratified by groups and sex.**

(A) Dot plots showing canonical marker gene expression used to define B cell subtypes. Dot size represents the percentage of cells expressing the gene and color intensity reflects average log-normalized expression.

(B) GSEA of B cells comparing CON vs LS and CON vs LS-CRC. Each dot represents an enriched pathway for a given B cell subtype, with color indicating NES and dot size reflecting the gene count. Enrichment was performed using curated gene sets related to immune and signaling pathways.

(C) Frequency of indicated B cell subtypes stratified by sex comparing CON, LS, and LS-CRC. Bars represent mean  $\pm$  SEM. Statistical significance was determined by two-way ANOVA (Holm-Šidák post hoc test, \* $p < 0.05$ , \*\* $p < 0.001$ ).

(D) Ratio of observed to expected cell number (Ro/e) scores for B cell subtypes stratified by sex. Values  $>1$  indicate overrepresentation relative to expected frequencies. Scores are color-scaled by mean Ro/e per group.

(E) Top DEGs per B cell subtype stratified by sex comparing CON, LS, and LS-CRC. Rows represent genes, and columns represent B cell subtypes. Color intensity denotes logFC values, with upregulation in red and downregulation in blue. Non-significant genes (  $p$ -value  $> 0.05$ ) are shaded in gray. Full statistical results including adjusted  $p$ -values (Benjamini-Hochberg correction) are provided in Table S5.



Figure S5

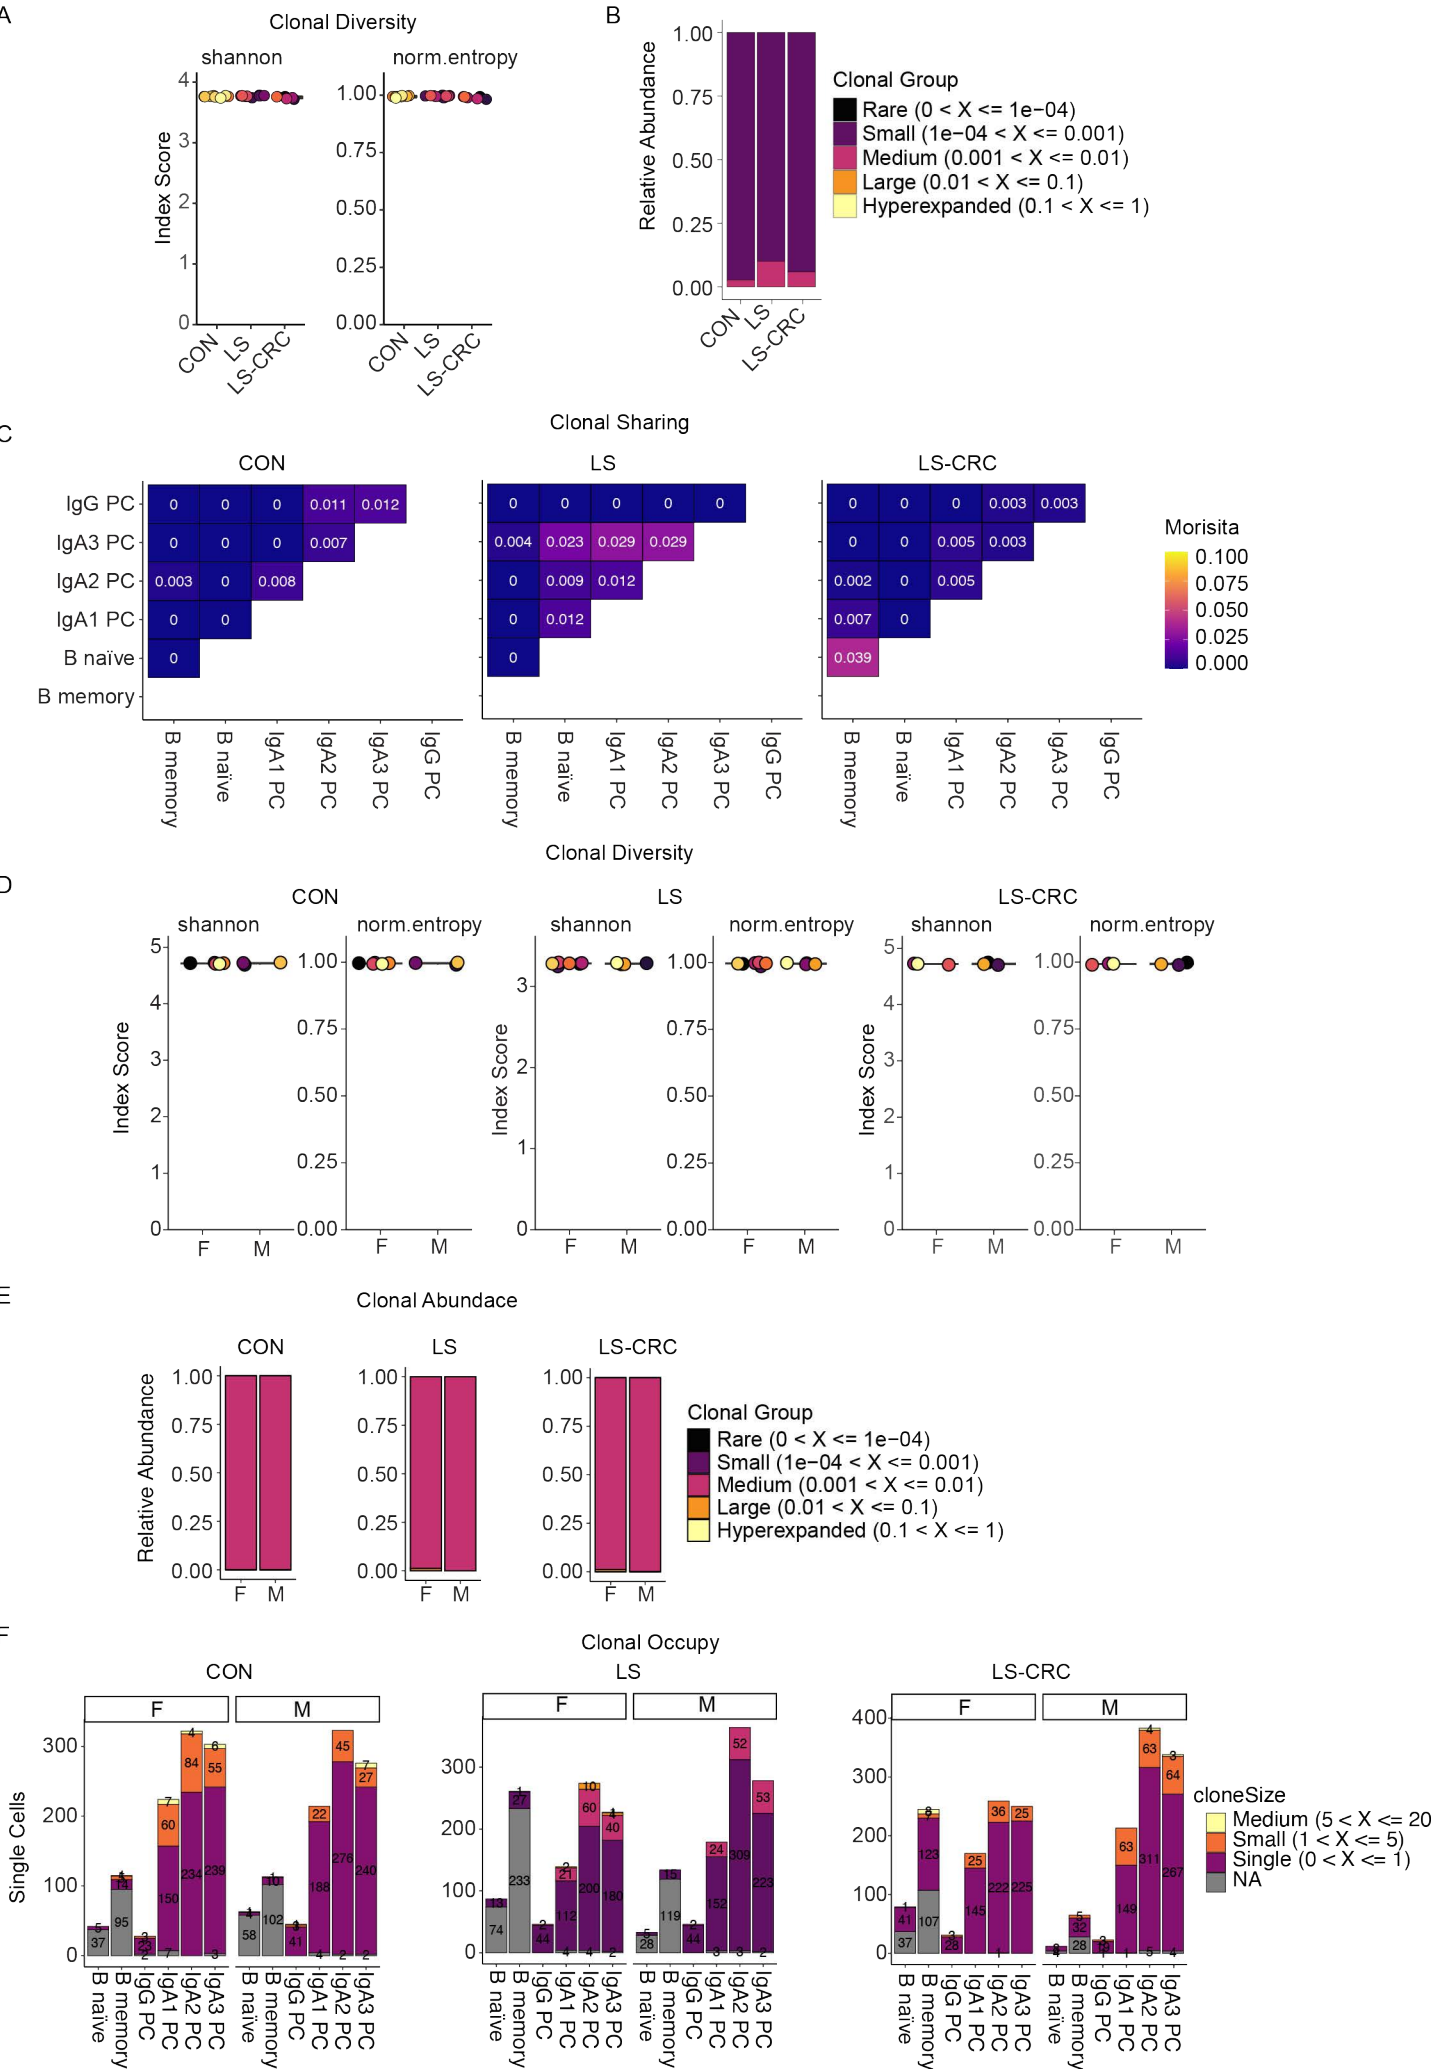

**Figure S5. Characterization of B cell receptor (BCR) stratified by groups and sex.**

- (A) Clonal diversity of BCR repertoires measured by Shannon entropy and normalized entropy (norm.entropy) in CON, LS, and LS-CRC groups. Values were calculated after downsampling to equal cell numbers across conditions (2,477 cells per group).
- (B) Stacked bar plot showing the relative abundance of BCR clonotypes stratified by clonal size categories: Rare ( $0 < X \leq 1e-4$ ), Small ( $1e-4 < X \leq 0.001$ ), Medium ( $0.001 < X \leq 0.01$ ), Large ( $0.01 < X \leq 0.1$ ), and Hyperexpanded ( $0.1 < X \leq 1$ ).
- (C) Clonal sharing matrices based on the Morisita index comparing B cell subtypes within each group. Each heatmap displays the extent of clonal overlap between B cell subtypes (rows vs. columns), with color intensity and numeric values reflecting the degree of overlap.
- (D) Clonal diversity of BCR repertoires measured by Shannon entropy and normalized entropy (norm.entropy) in CON, LS, and LS-CRC groups, stratified by sex. Diversity metrics were calculated after downsampling to control for sampling bias.
- (E) Stacked bar plots showing the relative abundance of BCR clonotypes classified by clonal size categories and sex. Clonotypes are grouped into five categories based on their relative frequencies: Rare ( $0 < X \leq 1e-4$ ), Small ( $1e-4 < X \leq 0.001$ ), Medium ( $0.001 < X \leq 0.01$ ), Large ( $0.01 < X \leq 0.1$ ), and Hyperexpanded ( $0.1 < X \leq 1$ ).
- (F) Clonal occupancy of B cell subtypes in male and female individuals from each group. Bar plots show the number of single cells per clone size (NA, Single, Small, Medium) within each subset.

Figure S6

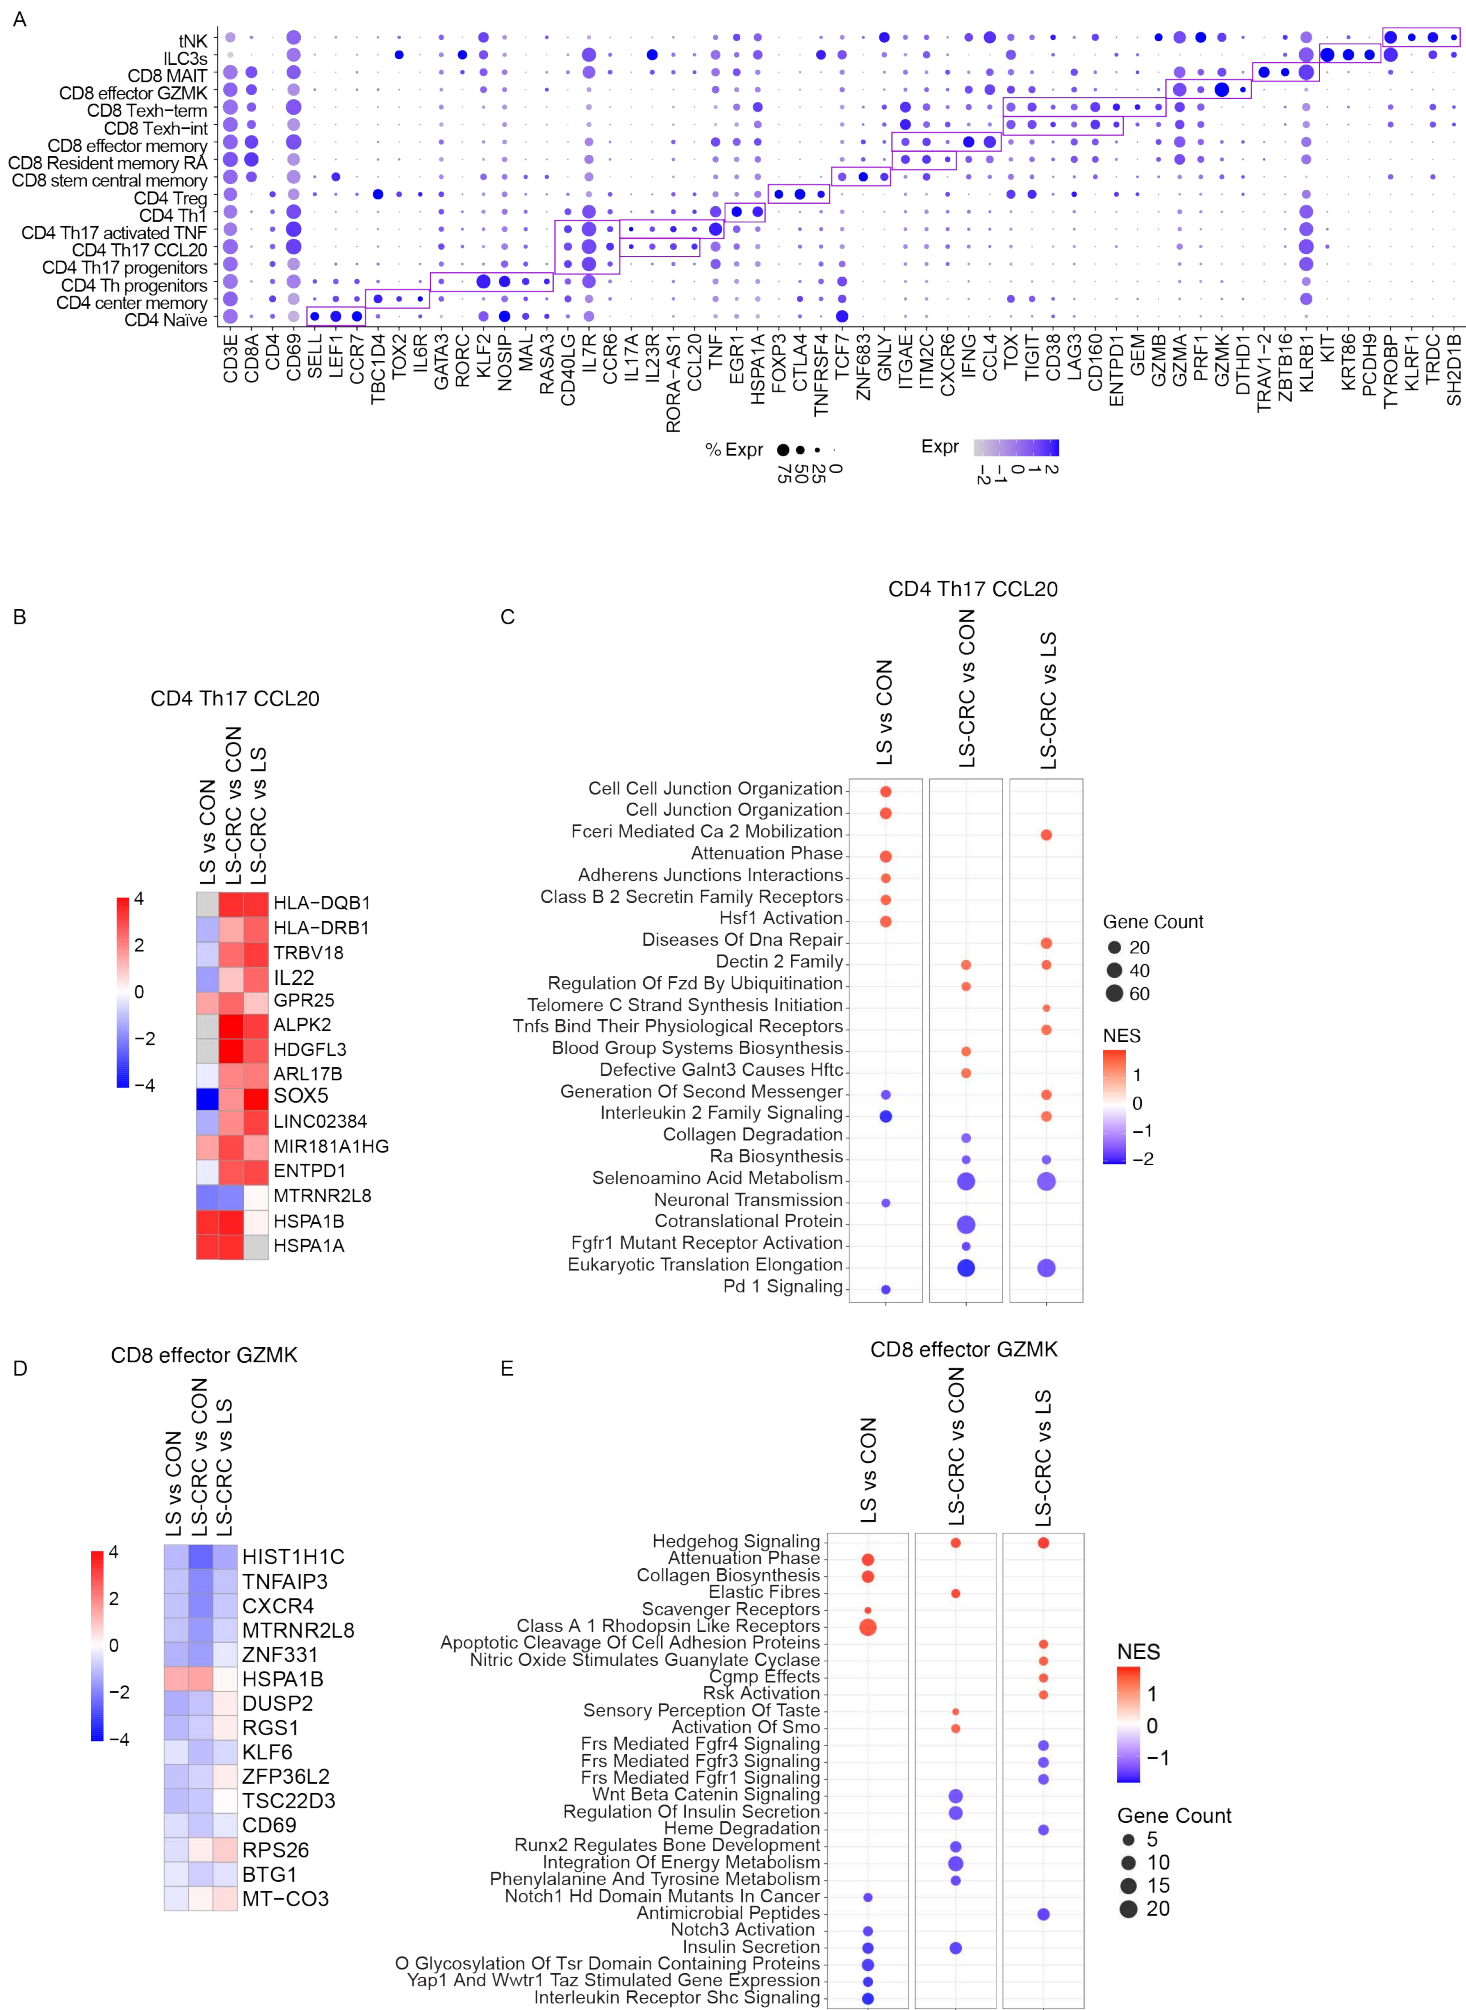

**Figure S6. Characterization and transcriptional profiling of T cell subtypes.**

(A) Dot plot displaying expression of canonical marker genes used to define T cell subtypes. Dot size represents the percentage of expressing cells, and color intensity reflects average log-normalized expression.

(B,D) Heatmaps showing the DEGs in CD4 Th17 CCL20 (B) and CD8 effector GZMK (D) cells comparing LS vs CON, LS-CRC vs CON, and LS-CRC vs LS. Color indicates logFC, with red indicating upregulation and blue indicating downregulation. Non-significant changes ( $p > 0.05$ ) are shown in gray. Full statistical results including adjusted p-values (Benjamini-Hochberg correction) are provided in Table S6.

(C,E) GSEA for CD4 Th17 CCL20 (C) and CD8 effector GZMK (E) cells comparing LS vs CON, LS-CRC vs CON, and LS-CRC vs LS. Each dot represents an enriched signaling pathway, with color denoting the NES and size corresponding to the gene count in the pathway.

Figure S7

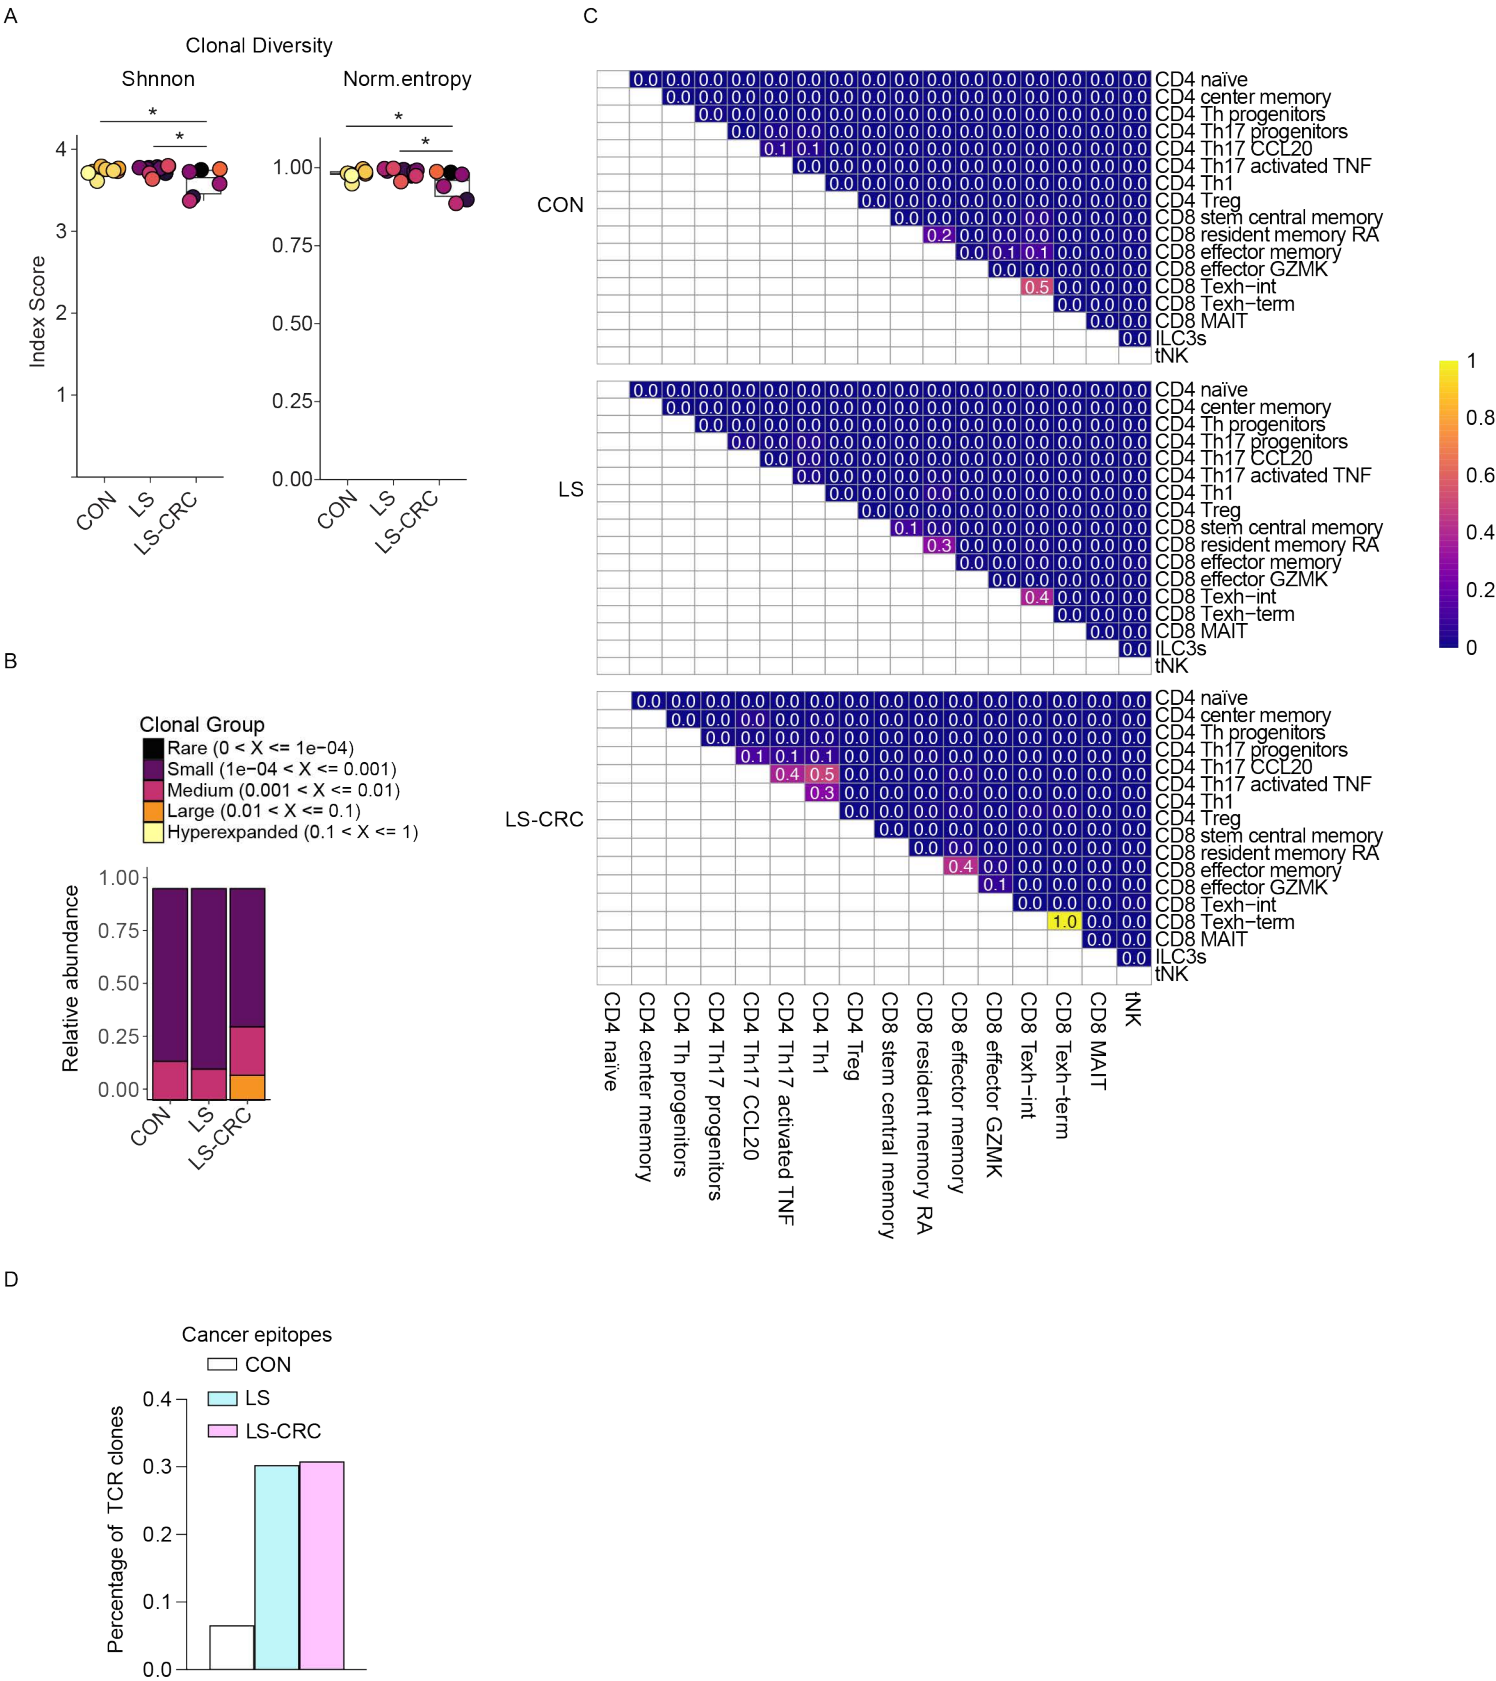

**Figure S7. Characterization of T cell receptor (TCR) repertoire and clonal sharing across groups.**

(A) Clonal diversity of TCR repertoires in CON, LS, and LS-CRC groups, assessed by Shannon entropy and normalized entropy (norm.entropy). All values were computed following downsampling to equal T cell numbers per group (2,191 cells per group). Statistical comparisons between groups were performed using Dunn's multiple comparisons test (Benjamini-Hochberg correction, (\*p < 0.05)

(B) Stacked bar plot showing the relative abundance of TCR clonotypes stratified by clonal size categories: Rare ( $0 < X \leq 1e-4$ ), Small ( $1e-4 < X \leq 0.001$ ), Medium ( $0.001 < X \leq 0.01$ ), Large ( $0.01 < X \leq 0.1$ ), and Hyperexpanded ( $0.1 < X \leq 1$ ).

(C) Clonal sharing matrices based on Morisita index values comparing TCR repertoire overlap between each T cell subtype (rows vs. columns) within CON, LS, and LS-CRC groups. Color intensity and numeric annotations reflect the extent of repertoire overlap.

(D) Proportion of T cells with TCR complementarity determining region 3 (CDR3) predicted to recognize tumor-associated antigens in the three study groups using Epitope Database (ScRepertoire).

**Figure S8**

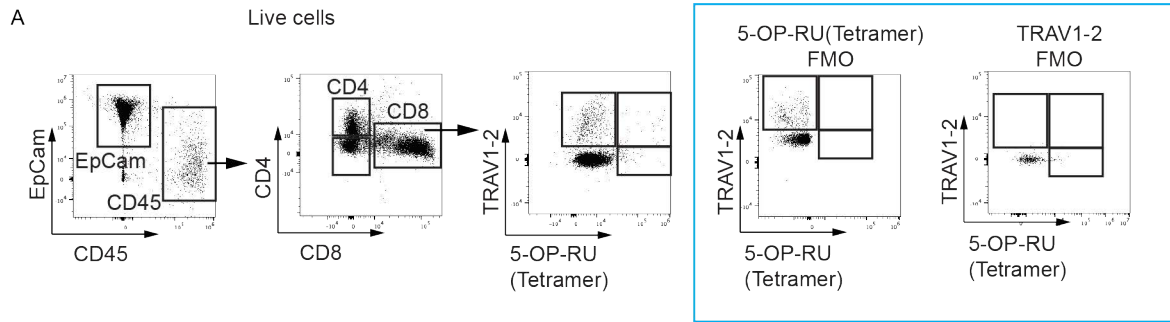

**Figure S8. Flow cytometry gating strategy for identification of MAIT cells**

(A) Representative flow cytometry plots depicting sequential gating steps from live cells.

**Figure S9**

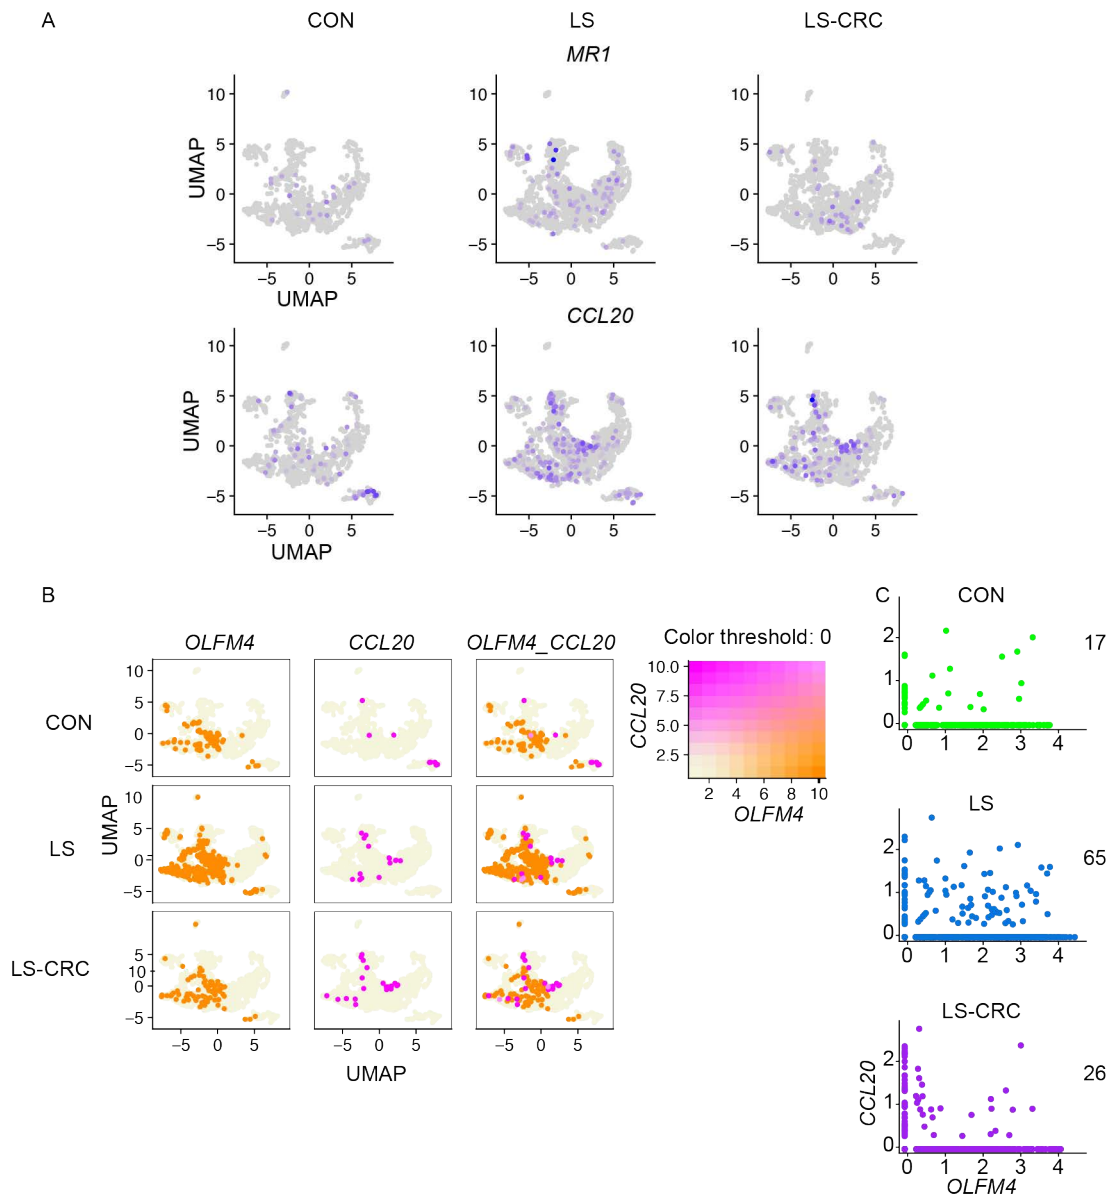

**Figure S9. Co-expression of CCL20 and OLFM4 identifies epithelial progenitor subsets in Lynch syndrome tissues**

(A) UMAP overlays showing expression of MR1 (top row) and CCL20 (bottom row) in epithelial cells from each group. Increased CCL20 expression is noted in LS and LS-CRC tissues.

(B) UMAP projections highlighting expression of OLFM4, CCL20, and their co-expression (OLFM4+CCL20+) in epithelial cells across conditions. Co-expressing cells were colored based on scaled gene expression intensity. A bivariate color threshold plot (right) was used to define OLFM4+CCL20+ double-positive populations.

(C) Scatter plots showing single-cell co-expression of CCL20 and OLFM4 with counts of double-positive cells indicated (right) after downsampling (493 epithelial stem and progenitor cells per group). LS tissues show the highest frequency of OLFM4+CCL20+ epithelial cells, suggesting enrichment of inflammatory stem/progenitor states in pre-malignant lesions.



**Figure S10**

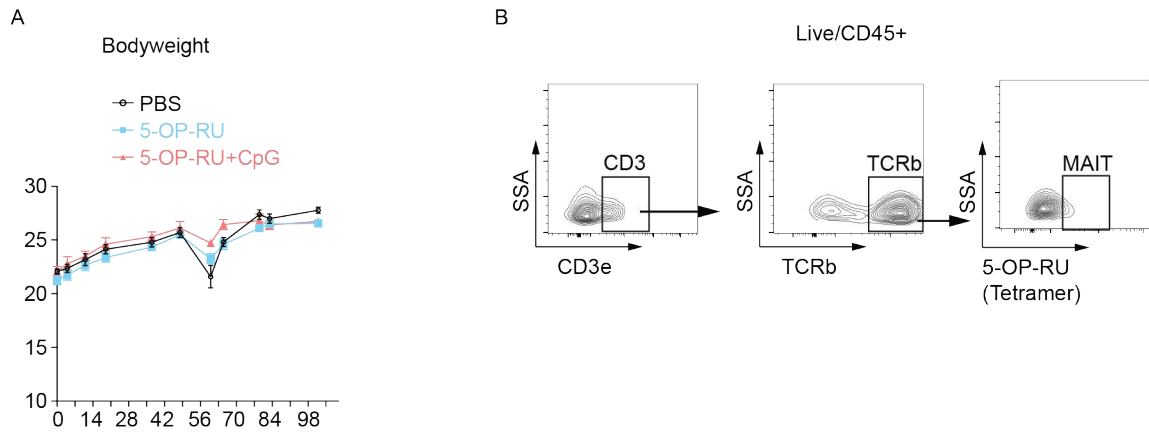

**Figure S10. Characterization of mice treated with 5-OP-RU and AOM/DSS**

(A) Longitudinal bodyweight measurements of mice treated with PBS, 5-OP-RU, or 5-OP-RU + CpG across the duration of the AOM/DSS experimental timeline. No significant differences in bodyweight were observed among treatment groups.

(B) Representative flow cytometry plots illustrating the sequential gating strategy used to identify MAIT cells. Gating was performed on live CD45<sup>+</sup> cells, followed by selection of CD3<sup>+</sup> T cells, TCR $\beta$ <sup>+</sup> lymphocytes, and 5-OP-RU tetramer-positive (MAIT) cells.
